# Supplementary material for: C-Type Natriuretic Peptide (CNP) Inhibition of Interferon-γ-Mediated Gene Expression in Human Endothelial Cells In Vitro
Source: Biosensors (Basel). 2018 Sep 14;8(3):86. doi: 10.3390/bios8030086 (PMC6164118; doi:10.3390/bios8030086)
Supplement: Supplementary file 1 [file biosensors-08-00086-s001.pdf]

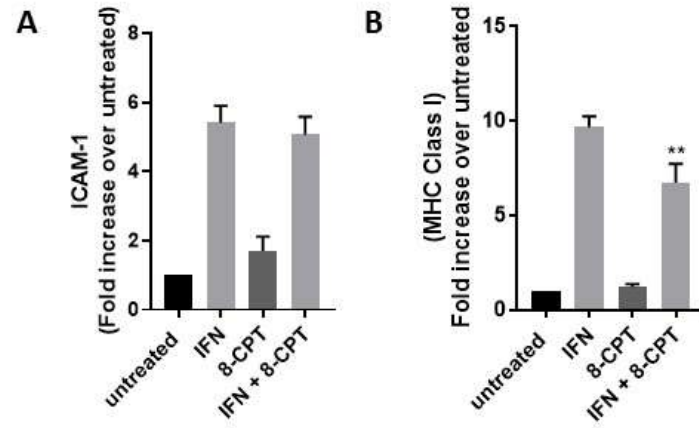

**Supplementary Figure 1:** ICAM-1 and MHC Class I expression in HUVEC after incubation with IFN- $\gamma$  alone or in combinations with 8-CPT cGMP for 48 h. Mean Fluorescence Intensity (expressed as mean  $\pm$  SEM fold increase over MFI of untreated cells), for (A) ICAM-1, (B) MHC Class I on untreated HUVEC or after 48 h treatment with IFN- $\gamma$  alone or in combination with 8-CPT-cGMP;  $n = 3$  HUVEC isolates (\*\* $p < 0.01$ , significantly different from IFN- $\gamma$  alone).
